# Supplementary material
Source: PubMed Central journal article supplement (PMC4105161)
Supplement: NIHMS599221-supplement-01.pdf [file NIHMS599221-supplement-01.pdf]

**Video Legend.**

**Video. Caval-aortic access and TAVR.** A sequence of annotated videos demonstrates caval-aortic access and TAVR in patient #1.

ACCEPTED MANUSCRIPT

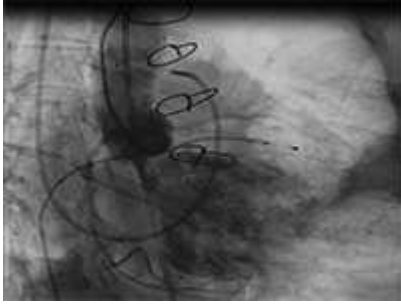

ACCEPTED MANUSCRIPT
